# Supplementary material
Source: publisher figshare collection journal article supplement (https://acs.figshare.com/ndownloader/files/3942415)
Supplement: Supplementary file 1 [file 3942415]

 
data_a 
 
_audit_creation_method            SHELXL-97 
_chemical_name_systematic 
; 
 ? 
; 
_chemical_name_common             ? 
_chemical_melting_point           ? 
_chemical_formula_moiety          'C69 H57 N15' 
_chemical_formula_sum 
 'C69 H57 N15' 
_chemical_formula_weight          1096.30 
 
loop_ 
 _atom_type_symbol 
 _atom_type_description 
 _atom_type_scat_dispersion_real 
 _atom_type_scat_dispersion_imag 
 _atom_type_scat_source 
 'C'  'C'   0.0033   0.0016 
 'International Tables Vol C Tables 4.2.6.8 and 6.1.1.4' 
 'H'  'H'   0.0000   0.0000 
 'International Tables Vol C Tables 4.2.6.8 and 6.1.1.4' 
 'N'  'N'   0.0061   0.0033 
 'International Tables Vol C Tables 4.2.6.8 and 6.1.1.4' 
 
_symmetry_cell_setting            hexagonal 
_symmetry_space_group_name_H-M    P6(3) 
 
loop_ 
 _symmetry_equiv_pos_as_xyz 
 'x, y, z' 
 'x-y, x, z+1/2' 
 '-y, x-y, z' 
 '-x, -y, z+1/2' 
 '-x+y, -x, z' 
 'y, -x+y, z+1/2' 
 
_cell_length_a                    19.986(4) 
_cell_length_b                    19.986(4) 
_cell_length_c                    8.8105(18) 
_cell_angle_alpha                 90.00 
_cell_angle_beta                  90.00 
_cell_angle_gamma                 120.00 
_cell_volume                      3047.8(11) 
_cell_formula_units_Z             2 
_cell_measurement_temperature     173(2) 
_cell_measurement_reflns_used     8340
_cell_measurement_theta_min       2.0326
_cell_measurement_theta_max       27.4822 
 
_exptl_crystal_description        'rod' 
_exptl_crystal_colour             'Colorless' 
_exptl_crystal_size_max           0.43 
_exptl_crystal_size_mid           0.19 
_exptl_crystal_size_min           0.10 
_exptl_crystal_density_meas       ? 
_exptl_crystal_density_diffrn     1.195 
_exptl_crystal_density_method     'not measured' 
_exptl_crystal_F_000              1152 
_exptl_absorpt_coefficient_mu     0.074 
_exptl_absorpt_correction_type    'multi-scan' 
_exptl_absorpt_correction_T_min   0.6205 
_exptl_absorpt_correction_T_max   1.0000 
_exptl_absorpt_process_details    'CrystalClear (Rigaku Inc., 2008)' 
 
_exptl_special_details 
; 
 ? 
; 
 
_diffrn_ambient_temperature       173(2) 
_diffrn_radiation_wavelength      0.71073 
_diffrn_radiation_type            MoK\a 
_diffrn_radiation_source          'fine-focus sealed tube' 
_diffrn_radiation_monochromator   graphite 
_diffrn_measurement_device_type   'Saturn724+ CCD' 
_diffrn_measurement_method        '\w scans at fixed \c = 45\%' 
_diffrn_detector_area_resol_mean  28.5714 
_diffrn_standards_number          ? 
_diffrn_standards_interval_count  ? 
_diffrn_standards_interval_time   ? 
_diffrn_standards_decay_%         ? 
_diffrn_reflns_number             17881 
_diffrn_reflns_av_R_equivalents   0.0720 
_diffrn_reflns_av_sigmaI/netI     0.0554 
_diffrn_reflns_limit_h_min        -23 
_diffrn_reflns_limit_h_max        23 
_diffrn_reflns_limit_k_min        -23 
_diffrn_reflns_limit_k_max        23 
_diffrn_reflns_limit_l_min        -10 
_diffrn_reflns_limit_l_max        10 
_diffrn_reflns_theta_min          2.04 
_diffrn_reflns_theta_max          25.00 
_reflns_number_total              3559 
_reflns_number_gt                 2940 
_reflns_threshold_expression      >2sigma(I) 
 
_computing_data_collection        'CrystalClear (Rigaku Inc., 2008)' 
_computing_cell_refinement        'CrystalClear (Rigaku Inc., 2008)' 
_computing_data_reduction         'CrystalClear (Rigaku Inc., 2008)' 
_computing_structure_solution     'SHELX-97 (Sheldrick, 2008)' 
_computing_structure_refinement   'SHELX-97 (Sheldrick, 2008)' 
_computing_molecular_graphics     
;
 Mercury: visualization and analysis of crystal structures, C. F. Macrae,
 P. R. Edgington, P. McCabe, E. Pidcock, G. P. Shields, R. Taylor,
 M. Towler and J. van de Streek, J. Appl. Cryst., 39, 453-457, 2006.
; 
_computing_publication_material   'SHELX-97 (Sheldrick, 2008)' 
 
_refine_special_details 
; 
 Refinement of F^2^ against ALL reflections.  The weighted R-factor wR and 
 goodness of fit S are based on F^2^, conventional R-factors R are based 
 on F, with F set to zero for negative F^2^. The threshold expression of 
 F^2^ > 2sigma(F^2^) is used only for calculating R-factors(gt) etc. and is 
 not relevant to the choice of reflections for refinement.  R-factors based 
 on F^2^ are statistically about twice as large as those based on F, and R- 
 factors based on ALL data will be even larger. 
; 
 
_refine_ls_structure_factor_coef  Fsqd  
_refine_ls_matrix_type            full 
_refine_ls_weighting_scheme       calc  
_refine_ls_weighting_details 
 'calc w=1/[\s^2^(Fo^2^)+(0.1000P)^2^+0.0000P] where P=(Fo^2^+2Fc^2^)/3' 
_atom_sites_solution_primary      direct 
_atom_sites_solution_secondary    difmap 
_atom_sites_solution_hydrogens    geom 
_refine_ls_hydrogen_treatment     constr 
_refine_ls_extinction_method      none 
_refine_ls_extinction_coef        ? 
_refine_ls_abs_structure_details 
 'Flack H D (1983), Acta Cryst. A39, 876-881' 
_refine_ls_abs_structure_Flack    1(8) 
_refine_ls_number_reflns          3559 
_refine_ls_number_parameters      339 
_refine_ls_number_restraints      317 
_refine_ls_R_factor_all           0.1435 
_refine_ls_R_factor_gt            0.1284 
_refine_ls_wR_factor_ref          0.3369 
_refine_ls_wR_factor_gt           0.3281 
_refine_ls_goodness_of_fit_ref    2.032 
_refine_ls_restrained_S_all       1.980 
_refine_ls_shift/su_max           0.089 
_refine_ls_shift/su_mean          0.010 
 
loop_ 
 _atom_site_label 
 _atom_site_type_symbol 
 _atom_site_fract_x 
 _atom_site_fract_y 
 _atom_site_fract_z 
 _atom_site_U_iso_or_equiv 
 _atom_site_adp_type 
 _atom_site_occupancy 
 _atom_site_symmetry_multiplicity 
 _atom_site_calc_flag 
 _atom_site_refinement_flags 
 _atom_site_disorder_assembly 
 _atom_site_disorder_group 
N1 N 0.5720(3) 0.5056(3) 0.5444(6) 0.0528(14) Uani 1 1 d . B . 
N2 N 0.7059(3) 0.5529(3) 0.5690(6) 0.0474(12) Uani 1 1 d . B . 
N3 N 0.8384(3) 0.6100(3) 0.5757(7) 0.0501(13) Uani 1 1 d . B . 
N4 N 0.9676(3) 0.6509(3) 0.5148(9) 0.0700(18) Uani 1 1 d . B . 
N5 N 1.0096(3) 0.5581(3) 0.5012(8) 0.0643(16) Uani 1 1 d . B . 
C1 C 0.5887(4) 0.5673(3) 0.4348(8) 0.0544(17) Uani 1 1 d D . . 
H1A H 0.5453 0.5484 0.3620 0.065 Uiso 1 1 calc R A 1 
H1B H 0.6355 0.5781 0.3768 0.065 Uiso 1 1 calc R A 1 
C2 C 0.6012(13) 0.6409(8) 0.502(3) 0.060(6) Uani 0.40(3) 1 d PDU B 1 
C3 C 0.5614(13) 0.6443(10) 0.629(2) 0.061(5) Uani 0.40(3) 1 d PDU B 1 
H3 H 0.5215 0.5992 0.6759 0.074 Uiso 0.40(3) 1 calc PR B 1 
C4 C 0.5838(15) 0.7177(10) 0.682(2) 0.062(5) Uani 0.40(3) 1 d PDU B 1 
H4 H 0.5604 0.7222 0.7718 0.074 Uiso 0.40(3) 1 calc PR B 1 
C5 C 0.6381(14) 0.7848(10) 0.611(2) 0.060(5) Uani 0.40(3) 1 d PDU B 1 
H5 H 0.6453 0.8331 0.6448 0.072 Uiso 0.40(3) 1 calc PR B 1 
C6 C 0.6822(13) 0.7825(10) 0.492(2) 0.065(5) Uani 0.40(3) 1 d PDU B 1 
H6 H 0.7235 0.8282 0.4494 0.078 Uiso 0.40(3) 1 calc PR B 1 
C7 C 0.6624(13) 0.7089(10) 0.437(3) 0.065(5) Uani 0.40(3) 1 d PDU B 1 
H7 H 0.6906 0.7046 0.3546 0.078 Uiso 0.40(3) 1 calc PR B 1 
C2' C 0.5927(11) 0.6381(7) 0.506(2) 0.094(5) Uani 0.60(3) 1 d PGDU B 2 
C3' C 0.5363(11) 0.6303(6) 0.609(2) 0.089(5) Uani 0.60(3) 1 d PGDU B 2 
H3' H 0.4943 0.5804 0.6320 0.107 Uiso 0.60(3) 1 calc PR B 2 
C4' C 0.5412(13) 0.6953(9) 0.6767(15) 0.094(5) Uani 0.60(3) 1 d PGDU B 2 
H4' H 0.5027 0.6900 0.7466 0.112 Uiso 0.60(3) 1 calc PR B 2 
C5' C 0.6026(12) 0.7683(7) 0.6425(16) 0.090(5) Uani 0.60(3) 1 d PGDU B 2 
H5' H 0.6060 0.8127 0.6890 0.108 Uiso 0.60(3) 1 calc PR B 2 
C6' C 0.6590(9) 0.7761(6) 0.540(2) 0.089(5) Uani 0.60(3) 1 d PGDU B 2 
H6' H 0.7010 0.8260 0.5168 0.106 Uiso 0.60(3) 1 calc PR B 2 
C7' C 0.6541(10) 0.7110(8) 0.472(2) 0.100(5) Uani 0.60(3) 1 d PGDU B 2 
H7' H 0.6926 0.7164 0.4021 0.119 Uiso 0.60(3) 1 calc PR B 2 
C8 C 0.6341(3) 0.5059(4) 0.6237(8) 0.0488(15) Uani 1 1 d . . . 
C9 C 0.6228(3) 0.4662(3) 0.7593(8) 0.0416(13) Uani 1 1 d . B . 
H9 H 0.5721 0.4340 0.7976 0.050 Uiso 1 1 calc R . . 
C10 C 0.6845(3) 0.4739(3) 0.8361(7) 0.0432(14) Uani 1 1 d . . . 
H10 H 0.6776 0.4482 0.9304 0.052 Uiso 1 1 calc R B . 
C11 C 0.7620(4) 0.5216(4) 0.7747(8) 0.0532(17) Uani 1 1 d . B . 
H11 H 0.8069 0.5266 0.8225 0.064 Uiso 1 1 calc R . . 
C12 C 0.7646(3) 0.5591(3) 0.6407(7) 0.0428(14) Uani 1 1 d . . . 
C13 C 0.8519(4) 0.6859(4) 0.5166(9) 0.066(2) Uani 1 1 d D . . 
H13A H 0.8027 0.6788 0.4750 0.079 Uiso 1 1 calc R B 1 
H13B H 0.8896 0.7025 0.4322 0.079 Uiso 1 1 calc R B 1 
C14 C 0.8815(7) 0.7487(7) 0.6345(15) 0.080(3) Uani 0.844(18) 1 d PDU B 1 
C15 C 0.8292(8) 0.7610(8) 0.7133(16) 0.093(4) Uani 0.844(18) 1 d PDU B 1 
H15 H 0.7759 0.7300 0.6897 0.112 Uiso 0.844(18) 1 calc PR B 1 
C16 C 0.8510(7) 0.8172(8) 0.8269(16) 0.101(4) Uani 0.844(18) 1 d PDU B 1 
H16 H 0.8122 0.8260 0.8686 0.122 Uiso 0.844(18) 1 calc PR B 1 
C17 C 0.9263(7) 0.8612(8) 0.8827(18) 0.110(4) Uani 0.844(18) 1 d PDU B 1 
H17 H 0.9404 0.8995 0.9590 0.132 Uiso 0.844(18) 1 calc PR B 1 
C18 C 0.9788(7) 0.8436(7) 0.8158(15) 0.092(3) Uani 0.844(18) 1 d PDU B 1 
H18 H 1.0309 0.8685 0.8499 0.110 Uiso 0.844(18) 1 calc PR B 1 
C19 C 0.9555(8) 0.7901(7) 0.7004(15) 0.097(3) Uani 0.844(18) 1 d PDU B 1 
H19 H 0.9937 0.7799 0.6607 0.117 Uiso 0.844(18) 1 calc PR B 1 
C14' C 0.8799(17) 0.7487(16) 0.632(4) 0.033(8) Uani 0.156(18) 1 d PGDU B 2 
C15' C 0.8307(12) 0.7699(17) 0.701(4) 0.037(8) Uani 0.156(18) 1 d PGDU B 2 
H15A H 0.7763 0.7371 0.6940 0.044 Uiso 0.156(18) 1 calc PR B 2 
C16' C 0.8611(12) 0.8391(15) 0.781(3) 0.040(8) Uani 0.156(18) 1 d PGDU B 2 
H16A H 0.8275 0.8536 0.8279 0.048 Uiso 0.156(18) 1 calc PR B 2 
C17' C 0.9406(13) 0.8870(11) 0.792(4) 0.041(8) Uani 0.156(18) 1 d PGDU B 2 
H17A H 0.9614 0.9343 0.8459 0.050 Uiso 0.156(18) 1 calc PR B 2 
C18' C 0.9898(11) 0.8658(13) 0.723(4) 0.041(8) Uani 0.156(18) 1 d PGDU B 2 
H18A H 1.0442 0.8985 0.7299 0.049 Uiso 0.156(18) 1 calc PR B 2 
C19' C 0.9594(16) 0.7966(15) 0.643(3) 0.035(8) Uani 0.156(18) 1 d PGDU B 2 
H19A H 0.9930 0.7821 0.5960 0.042 Uiso 0.156(18) 1 calc PR B 2 
C20 C 0.8927(4) 0.5904(4) 0.5586(8) 0.0532(16) Uani 1 1 d . . . 
C21 C 0.8801(3) 0.5154(3) 0.5708(8) 0.0484(15) Uani 1 1 d . B . 
H21 H 0.8308 0.4738 0.5986 0.058 Uiso 1 1 calc R . . 
C22 C 0.9416(4) 0.5032(3) 0.5412(8) 0.0533(16) Uani 1 1 d . . . 
C23 C 1.0175(4) 0.6295(4) 0.4913(10) 0.068(2) Uani 1 1 d . . . 
H23 H 1.0674 0.6697 0.4626 0.082 Uiso 1 1 calc R B . 
 
loop_ 
 _atom_site_aniso_label 
 _atom_site_aniso_U_11 
 _atom_site_aniso_U_22 
 _atom_site_aniso_U_33 
 _atom_site_aniso_U_23 
 _atom_site_aniso_U_13 
 _atom_site_aniso_U_12 
N1 0.054(3) 0.055(3) 0.048(3) 0.003(3) -0.010(3) 0.027(3) 
N2 0.058(3) 0.046(3) 0.046(3) -0.003(2) -0.003(2) 0.031(2) 
N3 0.042(3) 0.041(3) 0.065(4) 0.004(3) 0.007(3) 0.019(2) 
N4 0.052(3) 0.053(3) 0.100(5) 0.010(4) 0.023(3) 0.023(3) 
N5 0.052(3) 0.059(3) 0.071(4) -0.001(3) 0.016(3) 0.020(3) 
C1 0.059(4) 0.040(3) 0.063(4) 0.003(3) -0.008(3) 0.024(3) 
C2 0.066(7) 0.052(7) 0.058(7) 0.008(5) -0.011(5) 0.026(5) 
C3 0.064(7) 0.053(7) 0.060(7) 0.003(5) -0.003(6) 0.025(5) 
C4 0.065(8) 0.059(7) 0.061(7) 0.004(5) -0.006(5) 0.031(5) 
C5 0.065(8) 0.051(6) 0.062(7) -0.003(5) -0.008(6) 0.027(5) 
C6 0.067(7) 0.054(7) 0.064(7) 0.012(5) 0.000(6) 0.024(5) 
C7 0.067(7) 0.057(7) 0.064(7) 0.012(5) -0.002(5) 0.026(5) 
C2' 0.101(7) 0.076(7) 0.092(7) 0.008(6) -0.012(6) 0.036(5) 
C3' 0.098(7) 0.077(6) 0.091(7) 0.001(5) -0.009(6) 0.043(5) 
C4' 0.103(7) 0.089(6) 0.085(7) 0.002(5) -0.008(5) 0.045(5) 
C5' 0.097(7) 0.084(6) 0.081(7) 0.003(5) 0.002(6) 0.040(5) 
C6' 0.099(7) 0.078(6) 0.091(7) 0.004(5) -0.001(6) 0.046(5) 
C7' 0.107(7) 0.081(7) 0.102(8) 0.008(6) -0.005(6) 0.041(5) 
C8 0.041(3) 0.050(3) 0.059(4) 0.003(3) 0.009(3) 0.025(3) 
C9 0.049(3) 0.041(3) 0.046(3) 0.004(3) 0.007(3) 0.031(3) 
C10 0.046(3) 0.047(3) 0.042(3) 0.003(3) 0.003(3) 0.027(3) 
C11 0.053(4) 0.058(4) 0.057(4) -0.001(3) -0.007(3) 0.034(3) 
C12 0.039(3) 0.042(3) 0.051(4) -0.005(3) 0.006(3) 0.022(3) 
C13 0.069(4) 0.056(4) 0.071(5) 0.027(4) 0.024(4) 0.030(3) 
C14 0.080(4) 0.074(4) 0.098(5) -0.001(3) -0.002(3) 0.047(3) 
C15 0.091(5) 0.090(5) 0.103(5) 0.002(4) 0.002(4) 0.049(3) 
C16 0.100(5) 0.102(5) 0.108(5) -0.001(4) 0.004(4) 0.055(3) 
C17 0.114(5) 0.104(5) 0.111(5) -0.002(4) 0.003(4) 0.054(4) 
C18 0.091(4) 0.095(5) 0.099(5) -0.002(4) 0.002(3) 0.053(3) 
C19 0.094(5) 0.096(5) 0.103(5) -0.002(4) 0.001(4) 0.048(3) 
C14' 0.032(9) 0.031(9) 0.039(9) 0.001(4) 0.000(4) 0.018(5) 
C15' 0.036(9) 0.036(9) 0.042(9) 0.001(4) 0.002(4) 0.020(5) 
C16' 0.040(9) 0.040(9) 0.042(9) 0.001(4) 0.001(4) 0.021(5) 
C17' 0.042(9) 0.041(9) 0.044(9) 0.000(4) 0.001(4) 0.023(5) 
C18' 0.039(9) 0.041(9) 0.041(9) -0.002(4) 0.002(4) 0.019(5) 
C19' 0.034(9) 0.035(9) 0.037(9) 0.001(4) 0.002(4) 0.017(5) 
C20 0.052(3) 0.047(3) 0.057(4) 0.005(3) 0.013(3) 0.022(3) 
C21 0.043(3) 0.047(3) 0.054(4) 0.000(3) 0.016(3) 0.022(3) 
C22 0.054(4) 0.046(3) 0.055(4) -0.001(3) 0.002(3) 0.021(3) 
C23 0.043(3) 0.061(4) 0.090(6) -0.007(4) 0.015(4) 0.017(3) 
 
_geom_special_details 
; 
 All esds (except the esd in the dihedral angle between two l.s. planes) 
 are estimated using the full covariance matrix.  The cell esds are taken 
 into account individually in the estimation of esds in distances, angles 
 and torsion angles; correlations between esds in cell parameters are only 
 used when they are defined by crystal symmetry.  An approximate (isotropic) 
 treatment of cell esds is used for estimating esds involving l.s. planes. 
; 
 
loop_ 
 _geom_bond_atom_site_label_1 
 _geom_bond_atom_site_label_2 
 _geom_bond_distance 
 _geom_bond_site_symmetry_2 
 _geom_bond_publ_flag 
N1 C8 1.423(8) . ? 
N1 C22 1.430(8) 3_655 ? 
N1 C1 1.467(8) . ? 
N2 C12 1.283(8) . ? 
N2 C8 1.351(7) . ? 
N3 C20 1.333(7) . ? 
N3 C12 1.428(7) . ? 
N3 C13 1.494(8) . ? 
N4 C23 1.283(9) . ? 
N4 C20 1.430(8) . ? 
N5 C22 1.298(8) . ? 
N5 C23 1.359(9) . ? 
C1 C2 1.488(9) . ? 
C1 C2' 1.515(8) . ? 
C1 H1A 0.9900 . ? 
C1 H1B 0.9900 . ? 
C2 C3 1.391(9) . ? 
C2 C7 1.419(9) . ? 
C3 C4 1.382(10) . ? 
C3 H3 0.9500 . ? 
C4 C5 1.380(10) . ? 
C4 H4 0.9500 . ? 
C5 C6 1.388(10) . ? 
C5 H5 0.9500 . ? 
C6 C7 1.403(10) . ? 
C6 H6 0.9500 . ? 
C7 H7 0.9500 . ? 
C2' C3' 1.3900 . ? 
C2' C7' 1.3900 . ? 
C3' C4' 1.3900 . ? 
C3' H3' 0.9500 . ? 
C4' C5' 1.3900 . ? 
C4' H4' 0.9500 . ? 
C5' C6' 1.3900 . ? 
C5' H5' 0.9500 . ? 
C6' C7' 1.3900 . ? 
C6' H6' 0.9500 . ? 
C7' H7' 0.9500 . ? 
C8 C9 1.389(9) . ? 
C9 C10 1.347(8) . ? 
C9 H9 0.9500 . ? 
C10 C11 1.457(9) . ? 
C10 H10 0.9500 . ? 
C11 C12 1.386(9) . ? 
C11 H11 0.9500 . ? 
C13 C14' 1.492(9) . ? 
C13 C14 1.505(8) . ? 
C13 H13A 0.9900 . ? 
C13 H13B 0.9900 . ? 
C14 C15 1.375(8) . ? 
C14 C19 1.409(8) . ? 
C15 C16 1.401(9) . ? 
C15 H15 0.9500 . ? 
C16 C17 1.400(9) . ? 
C16 H16 0.9500 . ? 
C17 C18 1.394(9) . ? 
C17 H17 0.9500 . ? 
C18 C19 1.376(9) . ? 
C18 H18 0.9500 . ? 
C19 H19 0.9500 . ? 
C14' C15' 1.3900 . ? 
C14' C19' 1.3900 . ? 
C15' C16' 1.3900 . ? 
C15' H15A 0.9500 . ? 
C16' C17' 1.3900 . ? 
C16' H16A 0.9500 . ? 
C17' C18' 1.3900 . ? 
C17' H17A 0.9500 . ? 
C18' C19' 1.3900 . ? 
C18' H18A 0.9500 . ? 
C19' H19A 0.9500 . ? 
C20 C21 1.393(8) . ? 
C21 C22 1.392(9) . ? 
C21 H21 0.9500 . ? 
C22 N1 1.430(8) 5_665 ? 
C23 H23 0.9500 . ? 
 
loop_ 
 _geom_angle_atom_site_label_1 
 _geom_angle_atom_site_label_2 
 _geom_angle_atom_site_label_3 
 _geom_angle 
 _geom_angle_site_symmetry_1 
 _geom_angle_site_symmetry_3 
 _geom_angle_publ_flag 
C8 N1 C22 121.2(5) . 3_655 ? 
C8 N1 C1 119.2(5) . . ? 
C22 N1 C1 117.9(5) 3_655 . ? 
C12 N2 C8 119.5(6) . . ? 
C20 N3 C12 122.6(5) . . ? 
C20 N3 C13 120.0(5) . . ? 
C12 N3 C13 117.4(5) . . ? 
C23 N4 C20 115.0(6) . . ? 
C22 N5 C23 115.3(6) . . ? 
N1 C1 C2 115.0(10) . . ? 
N1 C1 C2' 113.3(9) . . ? 
C2 C1 C2' 5.8(14) . . ? 
N1 C1 H1A 108.5 . . ? 
C2 C1 H1A 108.5 . . ? 
C2' C1 H1A 104.6 . . ? 
N1 C1 H1B 108.5 . . ? 
C2 C1 H1B 108.5 . . ? 
C2' C1 H1B 114.1 . . ? 
H1A C1 H1B 107.5 . . ? 
C3 C2 C7 121.2(13) . . ? 
C3 C2 C1 123.5(14) . . ? 
C7 C2 C1 115.1(14) . . ? 
C4 C3 C2 115.6(15) . . ? 
C4 C3 H3 122.2 . . ? 
C2 C3 H3 122.2 . . ? 
C5 C4 C3 124.1(17) . . ? 
C5 C4 H4 118.0 . . ? 
C3 C4 H4 118.0 . . ? 
C4 C5 C6 120.8(17) . . ? 
C4 C5 H5 119.6 . . ? 
C6 C5 H5 119.6 . . ? 
C5 C6 C7 116.4(17) . . ? 
C5 C6 H6 121.8 . . ? 
C7 C6 H6 121.8 . . ? 
C6 C7 C2 121.4(17) . . ? 
C6 C7 H7 119.3 . . ? 
C2 C7 H7 119.3 . . ? 
C3' C2' C7' 120.0 . . ? 
C3' C2' C1 120.3(11) . . ? 
C7' C2' C1 119.7(11) . . ? 
C2' C3' C4' 120.0 . . ? 
C2' C3' H3' 120.0 . . ? 
C4' C3' H3' 120.0 . . ? 
C5' C4' C3' 120.0 . . ? 
C5' C4' H4' 120.0 . . ? 
C3' C4' H4' 120.0 . . ? 
C4' C5' C6' 120.0 . . ? 
C4' C5' H5' 120.0 . . ? 
C6' C5' H5' 120.0 . . ? 
C5' C6' C7' 120.0 . . ? 
C5' C6' H6' 120.0 . . ? 
C7' C6' H6' 120.0 . . ? 
C6' C7' C2' 120.0 . . ? 
C6' C7' H7' 120.0 . . ? 
C2' C7' H7' 120.0 . . ? 
N2 C8 C9 121.2(6) . . ? 
N2 C8 N1 116.6(6) . . ? 
C9 C8 N1 121.9(5) . . ? 
C10 C9 C8 119.2(6) . . ? 
C10 C9 H9 120.4 . . ? 
C8 C9 H9 120.4 . . ? 
C9 C10 C11 120.1(6) . . ? 
C9 C10 H10 119.9 . . ? 
C11 C10 H10 119.9 . . ? 
C12 C11 C10 114.2(5) . . ? 
C12 C11 H11 122.9 . . ? 
C10 C11 H11 122.9 . . ? 
N2 C12 C11 125.6(6) . . ? 
N2 C12 N3 116.2(6) . . ? 
C11 C12 N3 118.2(5) . . ? 
C14' C13 N3 114.6(17) . . ? 
C14' C13 C14 1(2) . . ? 
N3 C13 C14 113.7(9) . . ? 
C14' C13 H13A 107.5 . . ? 
N3 C13 H13A 108.8 . . ? 
C14 C13 H13A 108.8 . . ? 
C14' C13 H13B 109.2 . . ? 
N3 C13 H13B 108.8 . . ? 
C14 C13 H13B 108.8 . . ? 
H13A C13 H13B 107.7 . . ? 
C15 C14 C19 110.8(10) . . ? 
C15 C14 C13 118.7(10) . . ? 
C19 C14 C13 129.3(10) . . ? 
C14 C15 C16 123.1(11) . . ? 
C14 C15 H15 118.5 . . ? 
C16 C15 H15 118.5 . . ? 
C17 C16 C15 124.0(12) . . ? 
C17 C16 H16 118.0 . . ? 
C15 C16 H16 118.0 . . ? 
C18 C17 C16 113.8(12) . . ? 
C18 C17 H17 123.1 . . ? 
C16 C17 H17 123.1 . . ? 
C19 C18 C17 120.2(12) . . ? 
C19 C18 H18 119.9 . . ? 
C17 C18 H18 119.9 . . ? 
C18 C19 C14 127.4(12) . . ? 
C18 C19 H19 116.3 . . ? 
C14 C19 H19 116.3 . . ? 
C15' C14' C19' 120.0 . . ? 
C15' C14' C13 122(2) . . ? 
C19' C14' C13 116.4(19) . . ? 
C16' C15' C14' 120.0 . . ? 
C16' C15' H15A 120.0 . . ? 
C14' C15' H15A 120.0 . . ? 
C15' C16' C17' 120.0 . . ? 
C15' C16' H16A 120.0 . . ? 
C17' C16' H16A 120.0 . . ? 
C16' C17' C18' 120.0 . . ? 
C16' C17' H17A 120.0 . . ? 
C18' C17' H17A 120.0 . . ? 
C19' C18' C17' 120.0 . . ? 
C19' C18' H18A 120.0 . . ? 
C17' C18' H18A 120.0 . . ? 
C18' C19' C14' 120.0 . . ? 
C18' C19' H19A 120.0 . . ? 
C14' C19' H19A 120.0 . . ? 
N3 C20 C21 124.9(5) . . ? 
N3 C20 N4 116.3(5) . . ? 
C21 C20 N4 118.7(5) . . ? 
C22 C21 C20 118.3(5) . . ? 
C22 C21 H21 120.9 . . ? 
C20 C21 H21 120.9 . . ? 
N5 C22 C21 123.1(6) . . ? 
N5 C22 N1 114.3(6) . 5_665 ? 
C21 C22 N1 122.5(6) . 5_665 ? 
N4 C23 N5 129.7(6) . . ? 
N4 C23 H23 115.2 . . ? 
N5 C23 H23 115.2 . . ? 
 
loop_ 
 _geom_torsion_atom_site_label_1 
 _geom_torsion_atom_site_label_2 
 _geom_torsion_atom_site_label_3 
 _geom_torsion_atom_site_label_4 
 _geom_torsion 
 _geom_torsion_site_symmetry_1 
 _geom_torsion_site_symmetry_2 
 _geom_torsion_site_symmetry_3 
 _geom_torsion_site_symmetry_4 
 _geom_torsion_publ_flag 
C8 N1 C1 C2 -81.2(12) . . . . ? 
C22 N1 C1 C2 113.3(12) 3_655 . . . ? 
C8 N1 C1 C2' -87.3(11) . . . . ? 
C22 N1 C1 C2' 107.3(10) 3_655 . . . ? 
N1 C1 C2 C3 -35(3) . . . . ? 
C2' C1 C2 C3 38(15) . . . . ? 
N1 C1 C2 C7 138.9(14) . . . . ? 
C2' C1 C2 C7 -148(18) . . . . ? 
C7 C2 C3 C4 2(3) . . . . ? 
C1 C2 C3 C4 176(2) . . . . ? 
C2 C3 C4 C5 4(3) . . . . ? 
C3 C4 C5 C6 -9(3) . . . . ? 
C4 C5 C6 C7 7(3) . . . . ? 
C5 C6 C7 C2 -1(3) . . . . ? 
C3 C2 C7 C6 -4(3) . . . . ? 
C1 C2 C7 C6 -178(2) . . . . ? 
N1 C1 C2' C3' -45.9(14) . . . . ? 
C2 C1 C2' C3' -155(17) . . . . ? 
N1 C1 C2' C7' 132.5(9) . . . . ? 
C2 C1 C2' C7' 24(16) . . . . ? 
C7' C2' C3' C4' 0.0 . . . . ? 
C1 C2' C3' C4' 178.4(16) . . . . ? 
C2' C3' C4' C5' 0.0 . . . . ? 
C3' C4' C5' C6' 0.0 . . . . ? 
C4' C5' C6' C7' 0.0 . . . . ? 
C5' C6' C7' C2' 0.0 . . . . ? 
C3' C2' C7' C6' 0.0 . . . . ? 
C1 C2' C7' C6' -178.4(16) . . . . ? 
C12 N2 C8 C9 2.4(9) . . . . ? 
C12 N2 C8 N1 175.9(5) . . . . ? 
C22 N1 C8 N2 150.5(6) 3_655 . . . ? 
C1 N1 C8 N2 -14.5(9) . . . . ? 
C22 N1 C8 C9 -36.0(9) 3_655 . . . ? 
C1 N1 C8 C9 159.0(6) . . . . ? 
N2 C8 C9 C10 -1.1(9) . . . . ? 
N1 C8 C9 C10 -174.3(6) . . . . ? 
C8 C9 C10 C11 -1.7(9) . . . . ? 
C9 C10 C11 C12 3.2(8) . . . . ? 
C8 N2 C12 C11 -0.6(9) . . . . ? 
C8 N2 C12 N3 -179.9(5) . . . . ? 
C10 C11 C12 N2 -2.1(9) . . . . ? 
C10 C11 C12 N3 177.2(5) . . . . ? 
C20 N3 C12 N2 -133.1(7) . . . . ? 
C13 N3 C12 N2 42.9(8) . . . . ? 
C20 N3 C12 C11 47.5(8) . . . . ? 
C13 N3 C12 C11 -136.5(6) . . . . ? 
C20 N3 C13 C14' -97.2(15) . . . . ? 
C12 N3 C13 C14' 86.6(15) . . . . ? 
C20 N3 C13 C14 -96.1(9) . . . . ? 
C12 N3 C13 C14 87.7(9) . . . . ? 
C14' C13 C14 C15 38(86) . . . . ? 
N3 C13 C14 C15 -93.2(12) . . . . ? 
C14' C13 C14 C19 -155(88) . . . . ? 
N3 C13 C14 C19 73.6(17) . . . . ? 
C19 C14 C15 C16 9.8(18) . . . . ? 
C13 C14 C15 C16 178.9(15) . . . . ? 
C14 C15 C16 C17 -7(2) . . . . ? 
C15 C16 C17 C18 -1(2) . . . . ? 
C16 C17 C18 C19 3(2) . . . . ? 
C17 C18 C19 C14 1(2) . . . . ? 
C15 C14 C19 C18 -8(2) . . . . ? 
C13 C14 C19 C18 -175.1(13) . . . . ? 
N3 C13 C14' C15' -100.5(19) . . . . ? 
C14 C13 C14' C15' -150(87) . . . . ? 
N3 C13 C14' C19' 94(2) . . . . ? 
C14 C13 C14' C19' 44(85) . . . . ? 
C19' C14' C15' C16' 0.0 . . . . ? 
C13 C14' C15' C16' -165(3) . . . . ? 
C14' C15' C16' C17' 0.0 . . . . ? 
C15' C16' C17' C18' 0.0 . . . . ? 
C16' C17' C18' C19' 0.0 . . . . ? 
C17' C18' C19' C14' 0.0 . . . . ? 
C15' C14' C19' C18' 0.0 . . . . ? 
C13 C14' C19' C18' 166(3) . . . . ? 
C12 N3 C20 C21 13.9(11) . . . . ? 
C13 N3 C20 C21 -162.0(7) . . . . ? 
C12 N3 C20 N4 -170.3(7) . . . . ? 
C13 N3 C20 N4 13.8(10) . . . . ? 
C23 N4 C20 N3 -176.4(7) . . . . ? 
C23 N4 C20 C21 -0.4(11) . . . . ? 
N3 C20 C21 C22 176.3(7) . . . . ? 
N4 C20 C21 C22 0.7(10) . . . . ? 
C23 N5 C22 C21 0.6(11) . . . . ? 
C23 N5 C22 N1 177.4(7) . . . 5_665 ? 
C20 C21 C22 N5 -0.8(11) . . . . ? 
C20 C21 C22 N1 -177.3(6) . . . 5_665 ? 
C20 N4 C23 N5 0.3(14) . . . . ? 
C22 N5 C23 N4 -0.4(13) . . . . ? 
 
_diffrn_measured_fraction_theta_max    0.997 
_diffrn_reflns_theta_full              25.00 
_diffrn_measured_fraction_theta_full   0.997 
_refine_diff_density_max    0.533 
_refine_diff_density_min   -0.280 
_refine_diff_density_rms    0.081 
# SQUEEZE RESULTS (APPEND TO CIF)
# Note: Data are Listed for all Voids in the P1 Unit Cell
# i.e. Centre of Gravity, Solvent Accessible Volume,
# Recovered number of Electrons in the Void and
# Details about the Squeezed Material
loop_
  _platon_squeeze_void_nr
  _platon_squeeze_void_average_x
  _platon_squeeze_void_average_y
  _platon_squeeze_void_average_z
  _platon_squeeze_void_volume
  _platon_squeeze_void_count_electrons
  _platon_squeeze_void_content
   1  0.333  0.667 -0.278       202        61 ' '
   2  0.667  0.333  0.222       202        61 ' '
   3  0.000  0.000  0.356        14         3 ' '
   4  0.000  0.000  0.856        14         3 ' '
_platon_squeeze_details
;
;
